# Supplementary material for: Comparative Morphology of the Wing Base Structure Illuminates Higher-Level Phylogeny of Holometabola
Source: MDPI journal article supplement (doi:10.3390/insects15030199), 2024-03-16
Supplement: s1 [file s1]

**Table 1. Taxa examined.**

| <b>Taxon</b>                                  | <b>Specimen</b> | <b>Collection information</b>                                                  |
|-----------------------------------------------|-----------------|--------------------------------------------------------------------------------|
| Megaloptera                                   |                 |                                                                                |
| <b>Corydalidae</b>                            |                 |                                                                                |
| Corydalinae                                   |                 |                                                                                |
| <i>Protohermes costalis</i> (Walker)          | 2♂              | CHINA, Zhejiang, Lin-an, Tianmushan, (CAU)                                     |
| Chauliodinae                                  |                 |                                                                                |
| <i>Neochondriodes punctatolus</i> Liu & Yang  | 2♂              | CHINA, Yunnan, Xishuangbanna, Menglun, 2009.V.30, Xiushuai Yang (CAU).         |
| <b>Sialidae</b>                               |                 |                                                                                |
| <i>Sialis sibirica</i> McLachlan              | 2♀              | CHINA, Heilongjiang, Maoershan, 2011.VII.2, Junchao Wang (CAU).                |
| Neuroptera                                    |                 |                                                                                |
| <b>Osmylidae</b>                              |                 |                                                                                |
| <i>Heterosmylus wolonganus</i> Yang           | 1♂              | CHINA, Henan, Songxian, Baiyunshan, 2008.III.15, Weihai Li (CAU).              |
| <i>Thyridosmylus</i> sp.                      | 1♀              | CHINA, Tibet, Hanmi, 2011.VIII.6, Lihua Wang (CAU).                            |
| <b>Chrysopidae</b>                            |                 |                                                                                |
| <i>Chrysoperla</i> sp.                        | 1♀              | CHINA, Sichuan, Emeishan, 2012.VIII.20, Liang Wang (CAU).                      |
| <i>Italo-chrysa</i> sp.                       | 1♀              | CHINA, Sichuan, Emeishan, 2012.VIII.20, Liang Wang (CAU).                      |
| <b>Nevrorthidae</b>                           |                 |                                                                                |
| <i>Nipponeurorthus fuscinervis</i> (Nakahara) | 1♀              | JAPAN, Hokkaido, Honbetsu, Yusen-kyo, 2013.VII.1, Xingyue Liu (CAU).           |
| Raphidioptera                                 |                 |                                                                                |
| <b>Raphidiidae</b>                            |                 |                                                                                |
| <i>Xanthostigma gobicola</i> Aspöck & Aspöck  | 2♂              | CHINA, Beijing, Yanqing, Songshan, 2010.VI.3, Lihua Wang (CAU).                |
| <b>Inocelliidae</b>                           |                 |                                                                                |
| <i>Inocellia fujiana</i> Yang                 | 2♂              | CHINA, Shanxi, Taigu, (CAU).                                                   |
| Hymenoptera                                   |                 |                                                                                |
| <b>Xyelidae</b>                               |                 |                                                                                |
| <i>Xyela</i> sp.                              | 1♀              | CHINA, Hubei, Yichang, Shennongjia, Xiaolongtan, 2011. V. 24, Zejian Li (CAU). |

|                                                  |       |                                                                                         |
|--------------------------------------------------|-------|-----------------------------------------------------------------------------------------|
| <b>Tenthredinidae</b>                            |       |                                                                                         |
| <i>Tenthredo</i> sp.                             | 2♀    | CHINA, Neimenggu, Saihanwula, Dadonggou, 2013.VII.24, Xiumei Lu (CAU).                  |
| <b>Diprionidae</b>                               |       |                                                                                         |
| <i>Neodiprion huizeensis</i> Xiao & Zhou, 1984   | 1♀    | CHINA, Yunnan, Huize, 2013, Maoling, Sheng (CAU).                                       |
| Coleoptera                                       |       |                                                                                         |
| <b>Cupedidae</b>                                 |       |                                                                                         |
| <i>Tenomerga</i> sp.                             | 1♀    | CHINA, Guangxi, Maoershan, 2003. VII. 2, Shuwen An (CAU).                               |
| <b>Carabidae</b>                                 |       |                                                                                         |
| <i>Macrocheilus bensoni</i> Hope, 1838           | 1♂    | CHINA, Yunnan, Mangshi, Mukang, 2013. VII. 14, Xuankun Li (CAU).                        |
| <i>Chlaenius bimaculatus lynx</i> Chaudoir, 1856 | 1♂    | CHINA, Yunnan, Mangshi, Mukang, 2013. VII. 14, Xuankun Li (CAU).                        |
| <b>Cicindelidae</b>                              |       |                                                                                         |
| <i>Cylindera</i> sp.                             | 2♂+1♀ | CHINA, Yunnan, Gongshan, Bingzhonglu, 2013. VII. 4, Xuankun Li (CAU).                   |
| <b>Cerambycidae</b>                              |       |                                                                                         |
| <i>Trichoferus guerryi</i> (Pic, 1915)           | 2♀    | CHINA, Yunnan, Baoshan, Baihualing, 2013. VII. 17, Xuankun Li (CAU).                    |
| <b>Melolonthidae</b>                             |       |                                                                                         |
| <i>Metabolus flavescens</i> Brenske              | 2♀    | CHINA, Beijing, Campus of China Agricultural University, 2014.III.26, Liang Wang (CAU). |
| Lepidoptera                                      |       |                                                                                         |
| <b>Sphingidae</b>                                |       |                                                                                         |
| <i>Macroglossum</i> sp.                          | 1♂    | CHINA, Beijing, Baiwangshan, 2012, IX. 28, Liang Wang (CAU).                            |
| <b>Nymphalidae</b>                               |       |                                                                                         |
| <i>Polygonia c-aureum</i> (Linnaeus)             | 1♂    | CHINA, Beijing, Wulingshan, Yumidi, 2013. IX. 18, Yuyu Wang (CAU).                      |
| Diptera                                          |       |                                                                                         |
| <b>Tipulidae</b>                                 |       |                                                                                         |
| <i>Tipula (Nippotipula) sinica</i> Alexander     | 1♂    | CHINA, Shaanxi, Louguantai, 1962, VIII.18, Fasheng Li (CAU).                            |
| <b>Pyrgotidae</b>                                |       |                                                                                         |

|                                             |        |                                                                                      |
|---------------------------------------------|--------|--------------------------------------------------------------------------------------|
| <i>Apyrgota breviventris</i> Shi, 1998      | 1♂     | CHINA, Yunnan, Baoshan, Baihualing, 2013. VII. 8, Xuankun Li (CAU).                  |
| <b>Syrphidae</b>                            |        |                                                                                      |
| <i>Episyrphus balteatus</i> (De Geer, 1776) | 1♂, 1♀ | CHINA, Zhejiang, Qingliangfeng, Tianchi, 2012. V. 15 (CAU).                          |
| <b>Tabanidae</b>                            |        |                                                                                      |
| <i>Tabanus</i> sp.                          | 1♀     | CHINA, Shanxi, Zhongtiaoshan, Botanical Garden, 2013. VII. 25, Tingting Zhang (CAU). |
| Trichoptera                                 |        |                                                                                      |
| <b>Phryganeidae</b>                         |        |                                                                                      |
| <i>Eubasilissa regina</i> (McLachlan, 1871) | 1♀     | CHINA, Tibet, Motuo, 2011, VIII. 18, Qingbin Zhan (CAU).                             |
| Mecoptera                                   |        |                                                                                      |
| <b>Bittacidae</b>                           |        |                                                                                      |
| <i>Bittacus</i> sp. Latreille               | 1♀+ 1♂ | CHINA, Shaanxi, Liubaxian, Guanghuashan, 2013. VIII. 20, Yuqiang Xi (CAU).           |
| <b>Panorpidae</b>                           |        |                                                                                      |
| <i>Panorpa pryleri</i> McLachlan, 1875      |        | <b>Yoshizawa</b>                                                                     |
| Strepsiptera                                |        |                                                                                      |
| <b>Corioxenidae</b>                         |        |                                                                                      |
| <i>Triozocera</i> sp.                       | 1♂     | CHINA, Guizhou, Dushan, 1981. 7, Wangmao Chen, Binghua Chen (CAU).                   |
| Plecoptera                                  |        |                                                                                      |
| <b>Gripopterygidae</b>                      |        |                                                                                      |
| <i>Illiesoperla australis</i>               |        | <b>Yoshizawa</b>                                                                     |
| Orthoptera                                  |        |                                                                                      |
| Ensifera                                    |        |                                                                                      |
| <b>Tettigoniidae</b>                        |        |                                                                                      |
| <i>Homorocoryphus ineosus</i>               |        |                                                                                      |
