# Supplementary material for: Comparative Morphology of the Wing Base Structure Illuminates Higher-Level Phylogeny of Holometabola
Source: MDPI journal article supplement (doi:10.3390/insects15030199), 2024-03-16
Supplement: s1 [file s1]

**Table 2. Data matrix for present phylogenetic analysis**

| Taxa            | 1 | 2 | 3 | 4 | 5 | 6 | 7 | 8 | 9 | 10 | 11 | 12 | 13 | 14 | 15 | 16 | 17 | 18 | 19 | 20 | 21 | 22 | 23 | 24 | 25 |
|-----------------|---|---|---|---|---|---|---|---|---|----|----|----|----|----|----|----|----|----|----|----|----|----|----|----|----|
| Gripopterygidae | 0 | 0 | 1 | 0 | 0 | 0 | 0 | 0 | 0 | 0  | 0  | 0  | 0  | 0  | 1  | 1  | 0  | 0  | 0  | 0  | 0  | 0  | 0  | 0  | 0  |
| Tettigoniidae   | 0 | 0 | 1 | 0 | 0 | 0 | 0 | 0 | 0 | 0  | 0  | 0  | 0  | 0  | 2  | 1  | 0  | 0  | 0  | 0  | 0  | 0  | 0  | 0  | 0  |
| Corydalinae     | 2 | 0 | 0 | 0 | 1 | 0 | 0 | 0 | 0 | 1  | 1  | 0  | 0  | 0  | 0  | 1  | 0  | 0  | 1  | 0  | 0  | 0  | 0  | 0  | 0  |
| Chauliodinae    | 2 | 0 | 0 | 0 | 1 | 0 | 0 | 0 | 0 | 1  | 1  | 0  | 0  | 0  | 0  | 1  | 0  | 0  | 1  | 0  | 0  | 0  | 0  | 0  | 0  |
| Sialidae        | 2 | 0 | 0 | 0 | 1 | 0 | 0 | 0 | 0 | 0  | 1  | 0  | 0  | 0  | 0  | 1  | 0  | 0  | 1  | 0  | 0  | 0  | 0  | 0  | 0  |
| Nevrorthidae    | 3 | 0 | 0 | 0 | 1 | 0 | 0 | 0 | 0 | 1  | 1  | 0  | 0  | 0  | 1  | 1  | 0  | 0  | 1  | 0  | 0  | 0  | 0  | 0  | 0  |
| Osmylidae       | 3 | 0 | 0 | 0 | 1 | 0 | 0 | 0 | 0 | 1  | 1  | 0  | 0  | 0  | 1  | 1  | 0  | 0  | 1  | 0  | 0  | 0  | 0  | 0  | 0  |
| Chrysopidae     | 3 | 0 | 0 | 0 | 1 | 0 | 0 | 0 | 0 | 1  | 1  | 0  | 0  | 0  | 0  | 1  | 0  | 0  | 1  | 0  | 0  | 0  | 0  | 0  | 0  |
| Raphidiidae     | 1 | 0 | 0 | 0 | 1 | 0 | 0 | 0 | 0 | 0  | 1  | 0  | 0  | 0  | 0  | 2  | 0  | 2  | 0  | 0  | 0  | 0  | 1  | 0  | 0  |
| Inocelliidae    | 1 | 0 | 0 | 0 | 1 | 0 | 0 | 0 | 0 | 0  | 1  | 0  | 0  | 0  | 0  | 2  | 0  | 2  | 0  | 0  | 0  | 0  | 1  | 0  | 0  |
| Cupedidae       | 0 | 0 | 0 | 0 | 1 | 2 | 3 | 1 | 0 | 0  | 1  | 0  | 0  | 0  | 0  | 3  | 0  | ?  | 0  | ?  | ?  | ?  | ?  | ?  | 0  |
| Carabidae       | 0 | 0 | 0 | 0 | 1 | 2 | 3 | 0 | 0 | 0  | 1  | ?  | ?  | 0  | 0  | ?  | 0  | ?  | 0  | ?  | ?  | ?  | ?  | ?  | 0  |
| Cicindelidae    | 0 | 0 | 0 | 0 | 1 | 2 | 3 | 0 | 0 | 0  | 1  | ?  | ?  | 0  | ?  | ?  | 0  | ?  | 0  | ?  | ?  | ?  | ?  | ?  | 0  |
| Cerambycidae    | 0 | 0 | 0 | 0 | 0 | 2 | 3 | 1 | 0 | 0  | 1  | ?  | ?  | 0  | 0  | ?  | 0  | ?  | 0  | ?  | ?  | ?  | ?  | ?  | 0  |
| Melolonthidae   | 0 | 0 | 0 | 0 | 0 | 2 | 3 | 1 | 0 | 0  | 1  | ?  | ?  | 0  | ?  | ?  | 0  | ?  | 0  | ?  | ?  | ?  | ?  | ?  | 0  |
| Xyelidae        | 4 | 1 | 0 | 0 | 2 | 0 | 0 | 0 | 1 | 0  | 0  | 0  | 0  | 1  | 1  | 1  | 1  | 3  | 1  | 0  | 2  | 1  | 3  | 0  | 1  |
| Tenthredinidae  | 4 | 1 | 0 | 0 | 0 | 1 | 0 | 0 | 1 | 0  | 0  | 0  | 0  | 1  | 1  | 1  | 1  | 3  | 1  | 0  | 2  | 1  | 3  | 0  | 1  |
| Diprionidae     | 4 | 1 | 0 | 0 | 0 | 1 | 0 | 0 | 1 | 0  | 0  | 0  | 0  | 1  | 1  | 1  | 1  | 3  | 1  | 0  | 2  | 1  | 3  | 0  | 1  |
| Phryganeidae    | 0 | 0 | 1 | 1 | 1 | 0 | 0 | 0 | 0 | 1  | 1  | 1  | 1  | 0  | 1  | 1  | 0  | 1  | 1  | 0  | 1  | 0  | 2  | 0  | 0  |

|              |   |   |   |   |   |   |   |   |   |   |   |   |   |   |   |   |   |   |   |   |   |   |   |   |   |
|--------------|---|---|---|---|---|---|---|---|---|---|---|---|---|---|---|---|---|---|---|---|---|---|---|---|---|
| Sphingidae   | 0 | 0 | 1 | 0 | 1 | 1 | 1 | 0 | 0 | 1 | 2 | 1 | 1 | 0 | 0 | 1 | 0 | 1 | 1 | 1 | 1 | 0 | 2 | 0 | 0 |
| Nymphalidae  | 0 | 0 | 1 | 0 | 1 | 1 | 1 | 0 | 0 | 1 | 2 | 1 | 1 | 0 | 0 | 1 | 0 | 1 | 1 | 1 | 1 | 0 | 2 | 0 | 0 |
| Bittacidae   | 0 | 0 | 0 | 0 | 1 | 0 | 2 | 0 | 0 | 0 | 3 | 0 | 1 | 0 | 1 | 1 | 0 | 1 | 1 | 0 | 1 | 0 | 2 | 1 | 0 |
| Panorpidae   | 0 | 0 | 0 | 0 | 1 | 0 | 2 | 0 | 0 | 0 | 3 | 0 | 1 | 0 | 1 | 1 | 0 | 1 | 1 | 0 | 1 | 0 | 2 | 1 | 0 |
| Tipulidae    | 0 | 0 | 0 | 0 | 2 | 0 | 0 | 0 | 0 | 0 | 3 | 2 | 1 | 0 | 1 | 1 | 0 | 1 | 1 | 0 | 1 | 0 | 2 | 1 | 0 |
| Tabanidae    | 0 | 0 | 0 | 0 | 2 | 0 | 0 | 0 | 0 | 0 | 3 | 2 | 1 | 0 | 1 | 1 | 0 | 1 | 1 | 0 | 1 | 0 | 2 | 1 | 0 |
| Pyrgotidae   | 0 | 0 | 0 | 0 | 2 | 0 | 0 | 0 | 0 | 0 | 3 | 2 | 1 | 0 | 1 | 0 | 0 | 1 | 1 | 0 | 1 | 0 | 2 | 1 | 0 |
| Syrphidae    | 0 | 0 | 0 | 0 | 2 | 0 | 0 | 0 | 0 | 0 | 3 | 2 | 1 | 0 | 1 | 0 | 0 | 1 | 1 | 0 | 1 | 0 | 2 | 1 | 0 |
| Corioxenidae | 0 | 0 | 0 | 0 | 2 | 0 | 0 | 0 | 0 | 0 | 1 | 2 | 0 | 0 | ? | ? | 0 | ? | 0 | 2 | ? | 2 | 4 | ? | ? |

|                | 26 | 27 | 28 | 29 | 30 | 31 | 32 | 33 | 34 | 35 | 36 | 37 | 38 | 39 | 40 | 41 | 42 | 43 | 44 | 45 | 46 | 47 | 48 | 49 | 50 | 51 | 52 | 53 |
|----------------|----|----|----|----|----|----|----|----|----|----|----|----|----|----|----|----|----|----|----|----|----|----|----|----|----|----|----|----|
| Griopterygidae | 0  | 1  | 0  | ?  | 3  | 0  | 0  | 2  | 2  | 0  | 0  | 0  | 0  | ?  | 0  | 0  | 0  | 0  | 0  | 2  | 0  | 0  | 0  | 0  | 0  | 0  | 0  | 0  |
| Tettigoniidae  | 0  | 1  | 0  | ?  | 3  | 0  | 0  | 2  | 0  | 0  | 0  | 0  | 0  | ?  | 0  | 0  | 0  | 0  | 0  | 2  | 0  | 0  | 0  | 0  | 0  | 0  | 0  | 0  |
| Corydalinae    | 2  | 0  | 1  | 1  | 0  | 0  | 0  | 0  | 1  | 0  | 2  | 1  | 1  | 1  | 0  | 1  | 1  | 0  | 1  | 2  | 1  | 0  | 0  | 0  | 0  | 1  | 2  | 1  |
| Chauliodinae   | 2  | 0  | 1  | 1  | 0  | 0  | 0  | 0  | 1  | 0  | 2  | 1  | 1  | 1  | 0  | 1  | 1  | 0  | 1  | 2  | 1  | 0  | 0  | 0  | 0  | 1  | 2  | 1  |
| Sialidae       | 2  | 1  | 1  | 1  | 0  | 0  | 0  | 0  | 1  | 0  | 2  | 0  | 1  | 0  | 0  | 1  | 1  | 0  | 1  | 2  | 1  | 0  | 0  | 0  | 0  | 1  | 2  | 1  |
| Nevrorthidae   | 2  | 0  | 1  | 1  | 0  | 0  | 1  | 0  | 3  | 0  | 2  | 0  | 1  | ?  | 0  | 1  | 1  | 0  | 0  | 2  | 1  | 0  | 0  | 0  | 0  | 0  | 2  | 1  |
| Osmylidae      | 2  | 0  | 1  | 1  | 0  | 0  | 1  | 0  | 3  | 0  | 2  | 0  | 1  | ?  | 0  | 1  | 1  | 0  | 0  | 2  | 1  | 0  | 0  | 0  | 0  | 0  | 2  | 1  |
| Chrysopidae    | 2  | 0  | 1  | 1  | 0  | 0  | 1  | 0  | 3  | 0  | 2  | 0  | 1  | ?  | 0  | 1  | 1  | 0  | 0  | 2  | 1  | 0  | 0  | 0  | 0  | 0  | 2  | 1  |
| Raphidiidae    | 1  | 0  | 2  | 1  | 0  | 0  | 0  | 1  | 1  | 0  | 2  | 0  | 1  | ?  | 0  | 1  | 1  | 0  | 0  | 2  | 1  | 0  | 0  | 1  | 0  | 0  | 1  | 1  |
| Inocelliidae   | 1  | 0  | 2  | 1  | 0  | 0  | 0  | 1  | 1  | 0  | 2  | 0  | 1  | 0  | 0  | 1  | 1  | 0  | 0  | 2  | 1  | 0  | 0  | 1  | 0  | 0  | 1  | 1  |
| Cupedidae      | 1  | 0  | 0  | 0  | 2  | 1  | 1  | 3  | 1  | 0  | 0  | 0  | 1  | 1  | 0  | 0  | 0  | 0  | 0  | 1  | 0  | 1  | 1  | 0  | 1  | 1  | 0  | 1  |

|                |   |   |   |   |   |   |   |   |   |   |   |   |   |   |   |   |   |   |   |   |   |   |   |   |   |   |   |   |
|----------------|---|---|---|---|---|---|---|---|---|---|---|---|---|---|---|---|---|---|---|---|---|---|---|---|---|---|---|---|
| Carabidae      | 3 | 0 | 0 | 0 | 2 | 1 | 1 | 3 | 1 | 0 | 1 | 0 | 1 | 1 | 1 | 0 | 1 | 1 | 0 | 0 | 0 | 1 | 2 | 0 | 1 | 0 | 0 | 1 |
| Cicindelidae   | 3 | 0 | 0 | 0 | 2 | 1 | 1 | 3 | 1 | 0 | 1 | 0 | 1 | 1 | 1 | 0 | 1 | 1 | 0 | 0 | 0 | 1 | 2 | 0 | 1 | 1 | 0 | 1 |
| Cerambycidae   | 1 | 0 | 0 | 0 | 2 | 1 | 0 | 3 | 1 | 0 | 1 | 0 | 1 | 1 | 1 | 0 | 1 | 1 | 0 | 1 | 0 | 1 | 2 | 0 | 1 | 1 | 0 | 1 |
| Melolonthidae  | 1 | 0 | 0 | 0 | 2 | 1 | 0 | 3 | 1 | 0 | 1 | 0 | 1 | 1 | 1 | 0 | 1 | 1 | 0 | 1 | 0 | 1 | 2 | 0 | 1 | 1 | 0 | 1 |
| Xyelidae       | 1 | 0 | 4 | 2 | 1 | 0 | 0 | 0 | 4 | 1 | 1 | 0 | 2 | 1 | 0 | 2 | 1 | 0 | 0 | 0 | 2 | 0 | 0 | 0 | 0 | 0 | 0 | 2 |
| Tenthredinidae | 1 | 0 | 0 | 0 | 1 | 0 | 0 | 1 | 4 | 1 | 1 | 0 | 2 | 1 | 0 | 2 | 0 | 0 | 0 | 0 | 2 | 0 | 0 | 0 | 0 | 0 | 0 | 2 |
| Diprionidae    | 1 | 0 | 0 | 0 | 1 | 0 | 0 | 1 | 4 | 1 | 1 | 0 | 2 | 1 | 0 | 2 | 0 | 0 | 0 | 0 | 2 | 0 | 0 | 0 | 0 | 0 | 0 | 2 |
| Phryganeidae   | 0 | 1 | 0 | 0 | 2 | 0 | 0 | 2 | 3 | 0 | 2 | 0 | 1 | 1 | 0 | 0 | 1 | 0 | 0 | 2 | 0 | 0 | 0 | 1 | 0 | 0 | 0 | 0 |
| Sphingidae     | 3 | 0 | 0 | 0 | 2 | 1 | 0 | 2 | 1 | 0 | 2 | 0 | 1 | 2 | 0 | 0 | 1 | 0 | 0 | 2 | 0 | 0 | 0 | 1 | 0 | 1 | 0 | 0 |
| Nymphalidae    | 3 | 0 | 0 | 0 | 2 | 1 | 0 | 2 | 1 | 0 | 2 | 0 | 1 | 2 | 0 | 0 | 0 | 0 | 0 | 2 | 0 | 0 | 0 | 1 | 0 | 1 | 0 | 0 |
| Bittacidae     | 0 | 0 | 3 | 2 | 3 | 0 | 1 | 0 | 1 | 0 | 1 | 0 | 0 | 1 | 0 | 0 | 0 | 0 | 0 | 2 | 0 | 0 | 0 | 0 | 0 | 0 | 0 | 0 |
| Panorpidae     | 0 | 1 | 3 | 2 | 3 | 0 | 1 | 0 | 1 | 0 | 2 | 0 | 0 | 0 | 0 | 0 | 0 | 0 | 0 | 2 | 0 | 0 | 0 | 0 | 0 | 0 | 0 | 0 |
| Tipulidae      | 0 | 0 | 0 | 0 | 3 | 0 | 1 | 0 | 2 | 0 | 0 | 0 | 1 | 0 | 0 | 0 | 1 | 0 | 0 | 0 | 0 | 0 | 0 | 0 | 0 | ? | 0 | 0 |
| Tabanidae      | 0 | 0 | 0 | 0 | 3 | 0 | 1 | 0 | 2 | 0 | ? | 0 | ? | 0 | 0 | 0 | 0 | 0 | 0 | ? | 0 | 0 | 0 | 0 | 0 | ? | 0 | 0 |
| Pyrgotidae     | 0 | 0 | 0 | 0 | 3 | 0 | 1 | 0 | 2 | 0 | ? | 0 | ? | 0 | 0 | 0 | ? | 0 | ? | ? | 0 | 0 | 0 | 0 | 0 | ? | 0 | 0 |
| Syrphidae      | 0 | 0 | 0 | 0 | 3 | 0 | 1 | 0 | ? | 0 | ? | 0 | ? | 0 | 0 | 0 | ? | 0 | ? | ? | 0 | 0 | 0 | 0 | 0 | ? | 0 | 0 |
| Corioxenidae   | 1 | 0 | 0 | 0 | ? | 0 | 2 | 0 | 1 | 0 | 1 | 0 | 1 | ? | 0 | 0 | 1 | ? | 0 | ? | 0 | ? | ? | 1 | 0 | 1 | 0 | 1 |
